# Supplementary figures and images for: Phylodynamic and Evolution of the Hemagglutinin (HA) and Neuraminidase (NA) Genes of Influenza A(H1N1) pdm09 Viruses Circulating in the 2009 and 2023 Seasons in Italy
Source: MDPI journal article supplement (doi:10.3390/pathogens13040334), 2024-04-17

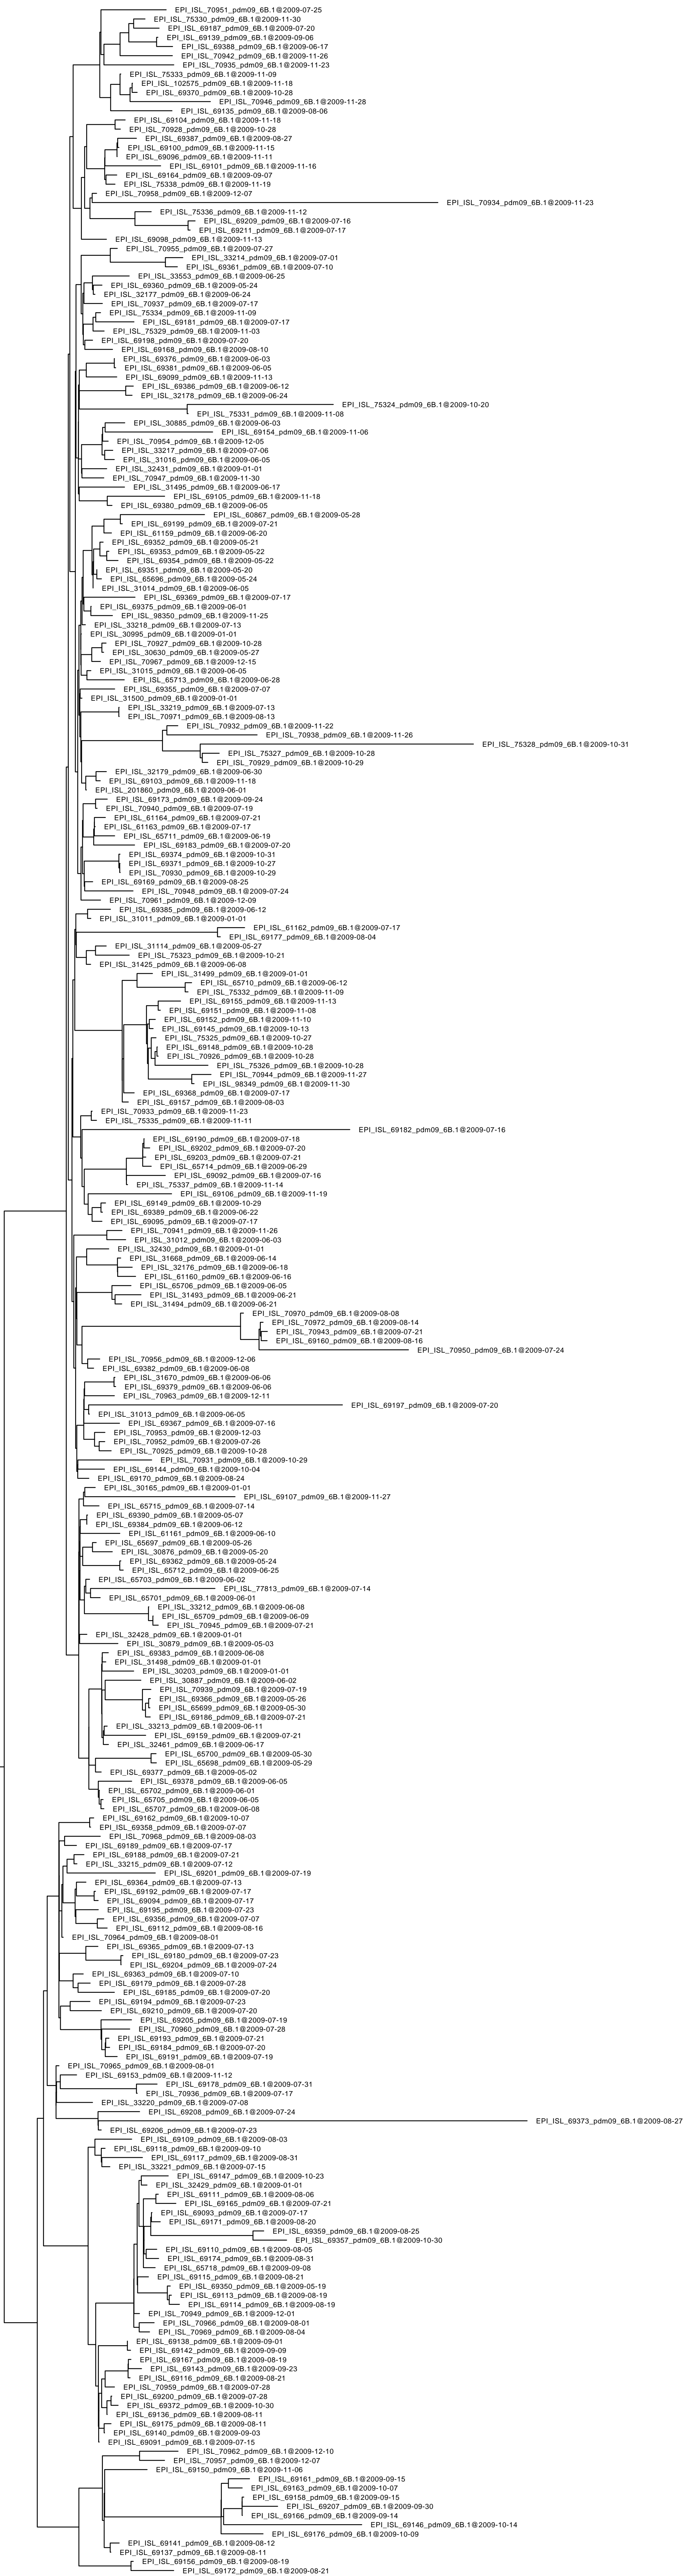

Supplement: s1 [file s1]

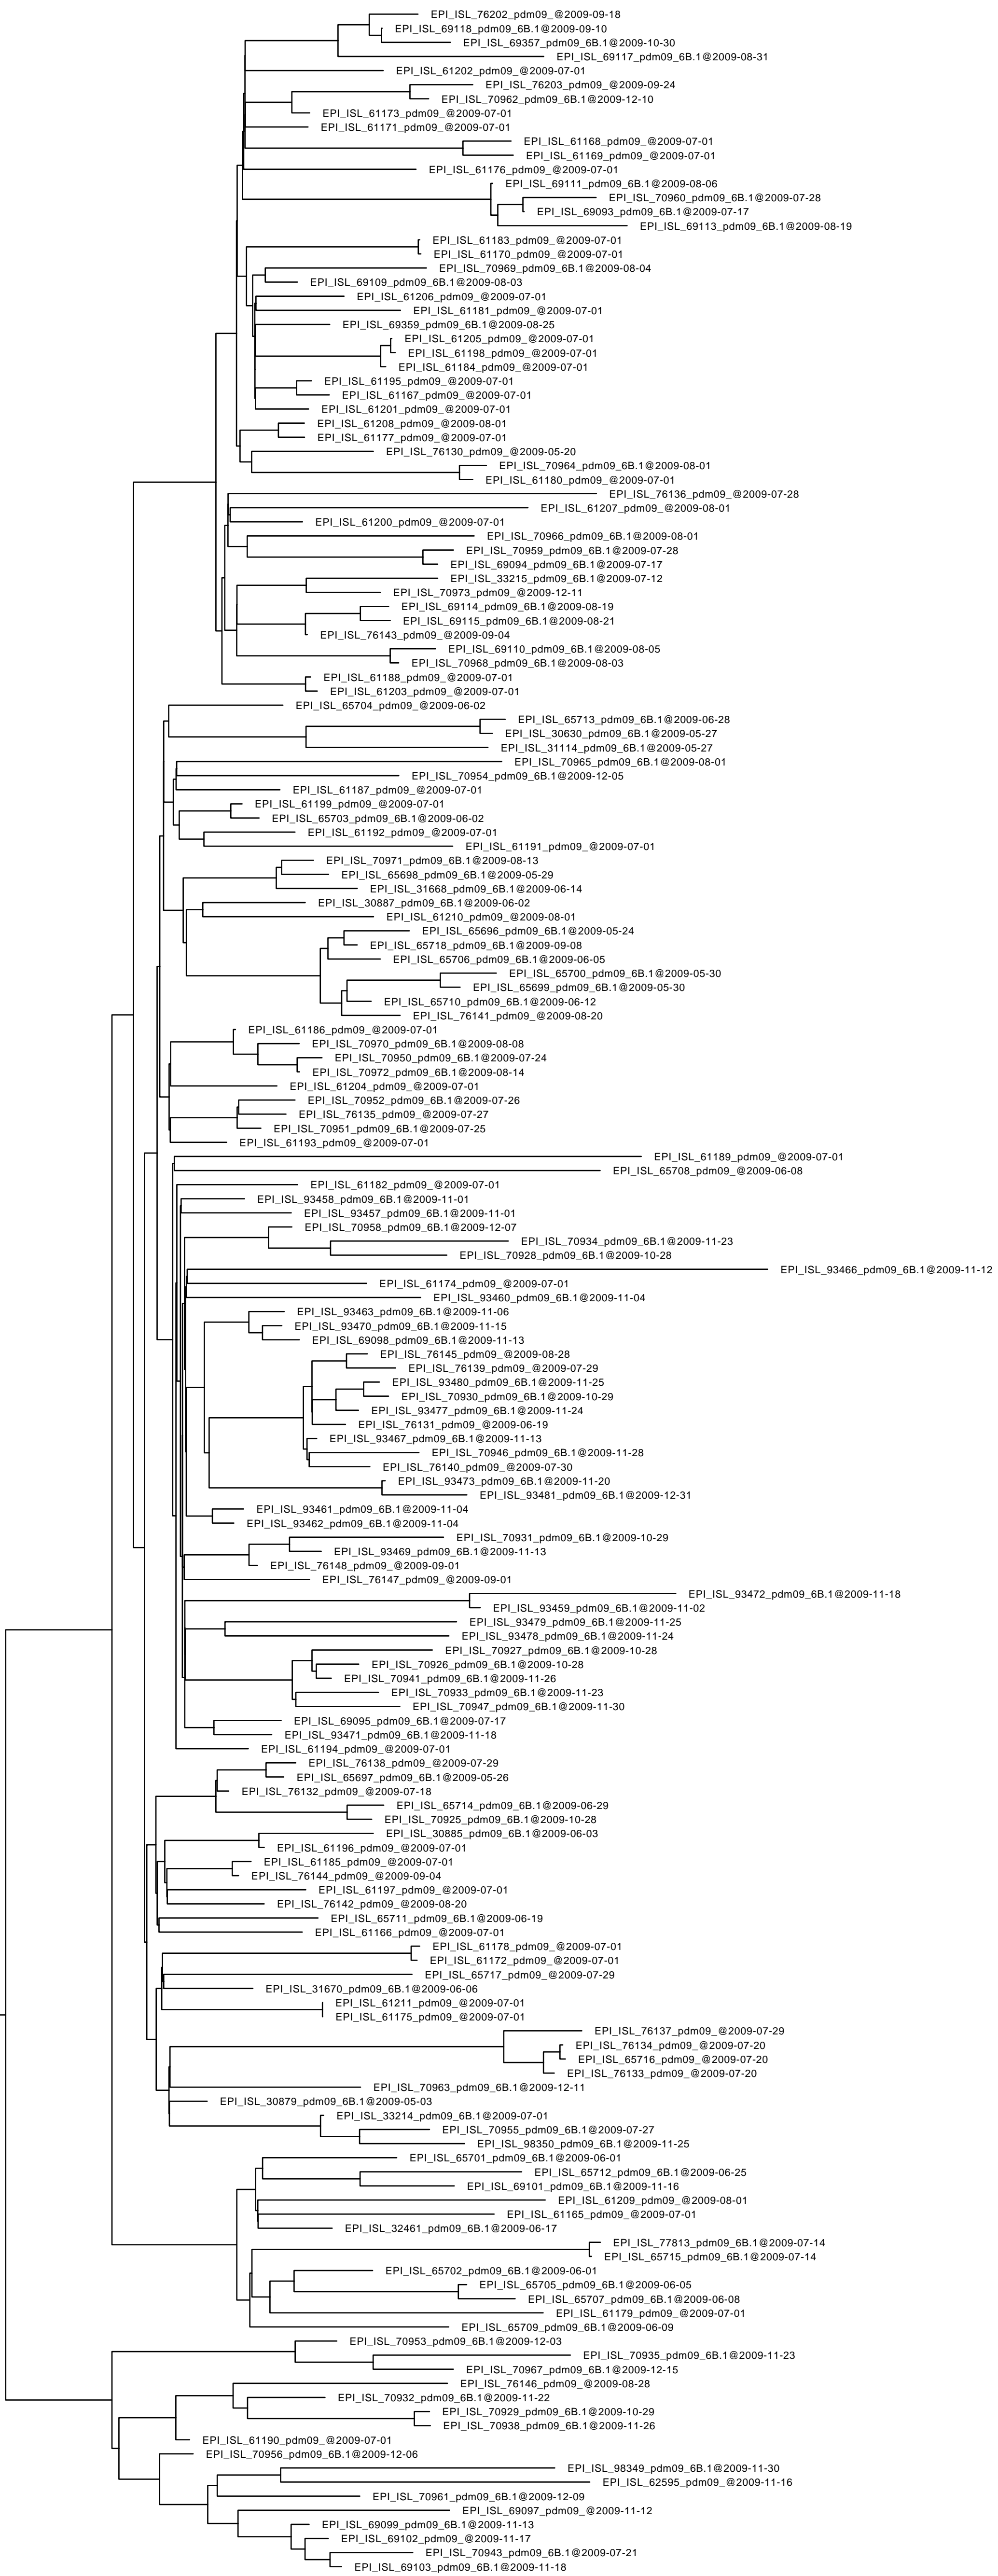

4.0E-4

Supplement: s1 [file s1]

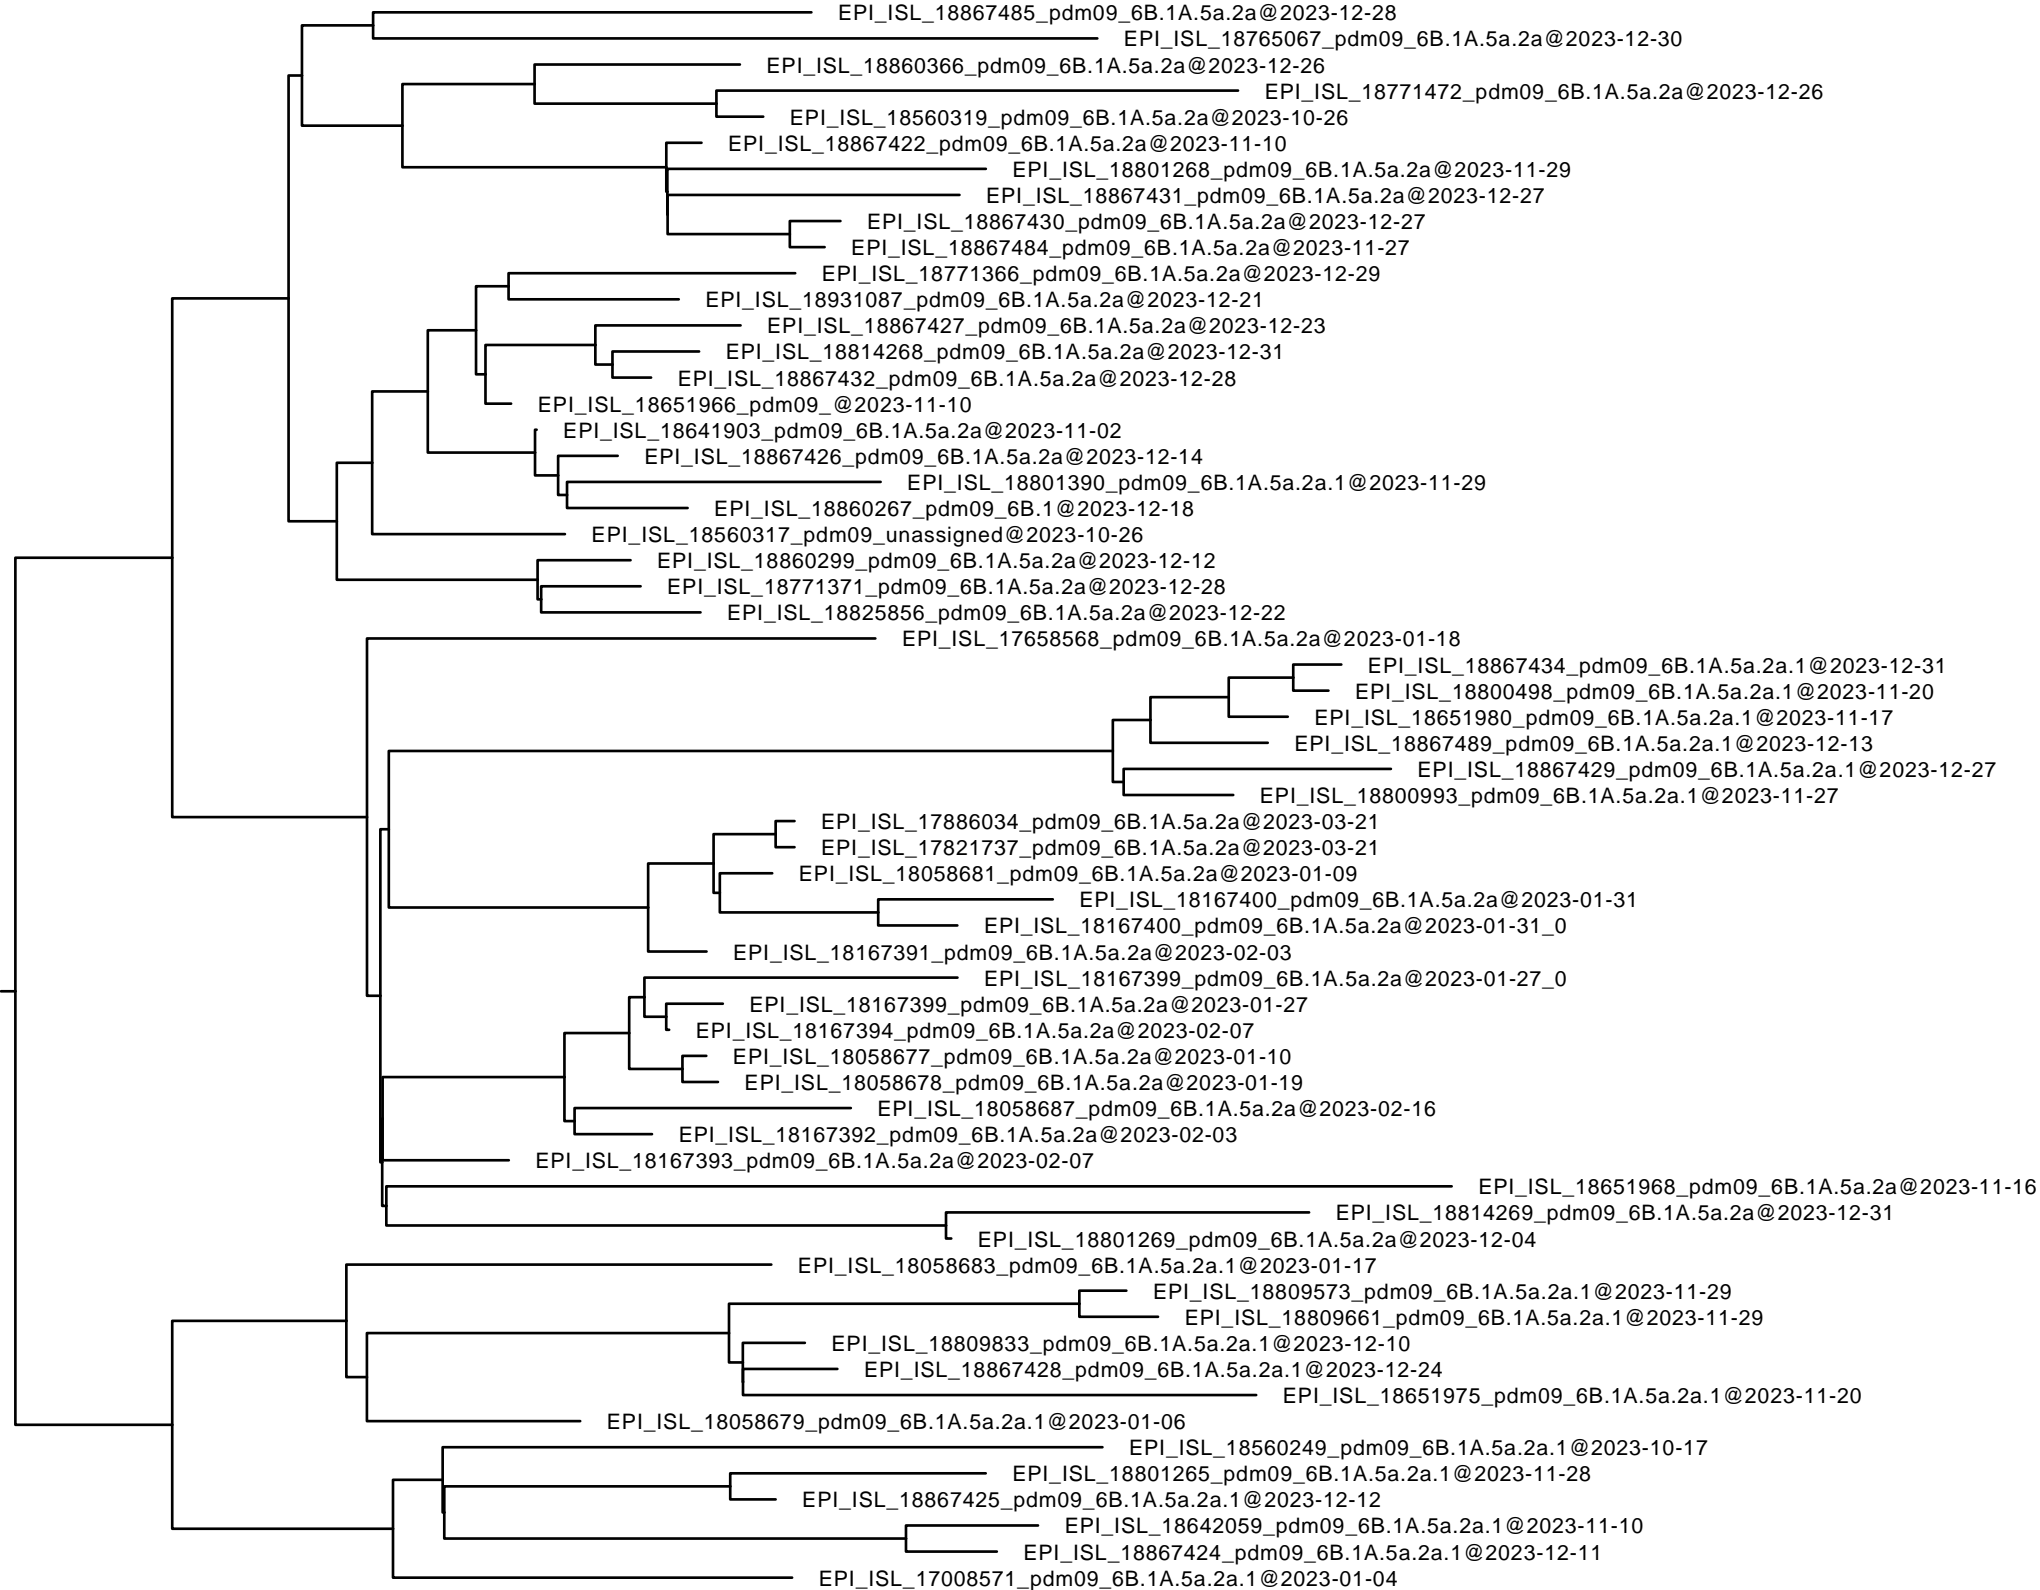

7.0E-4

Supplement: s1 [file s1]

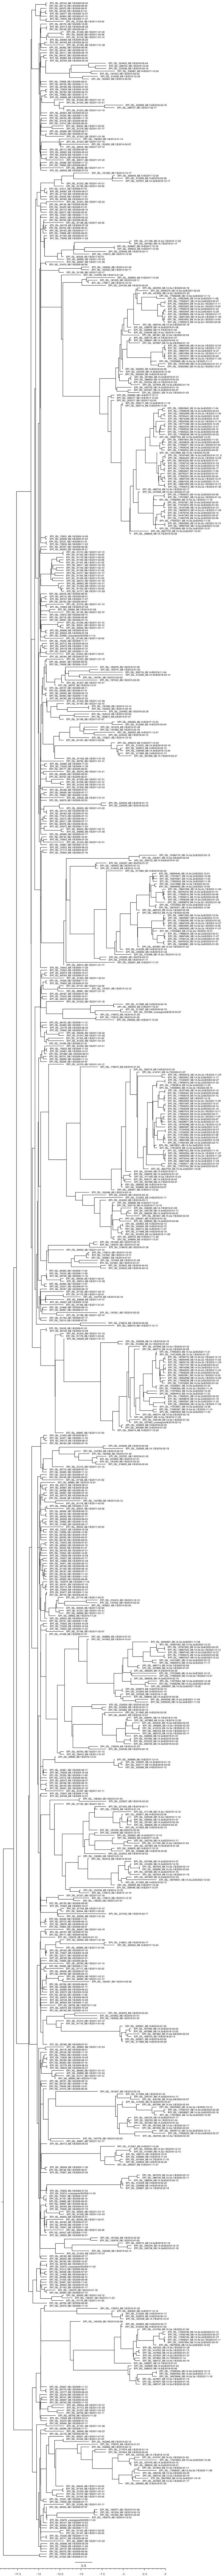

Supplement: s1 [file s1]

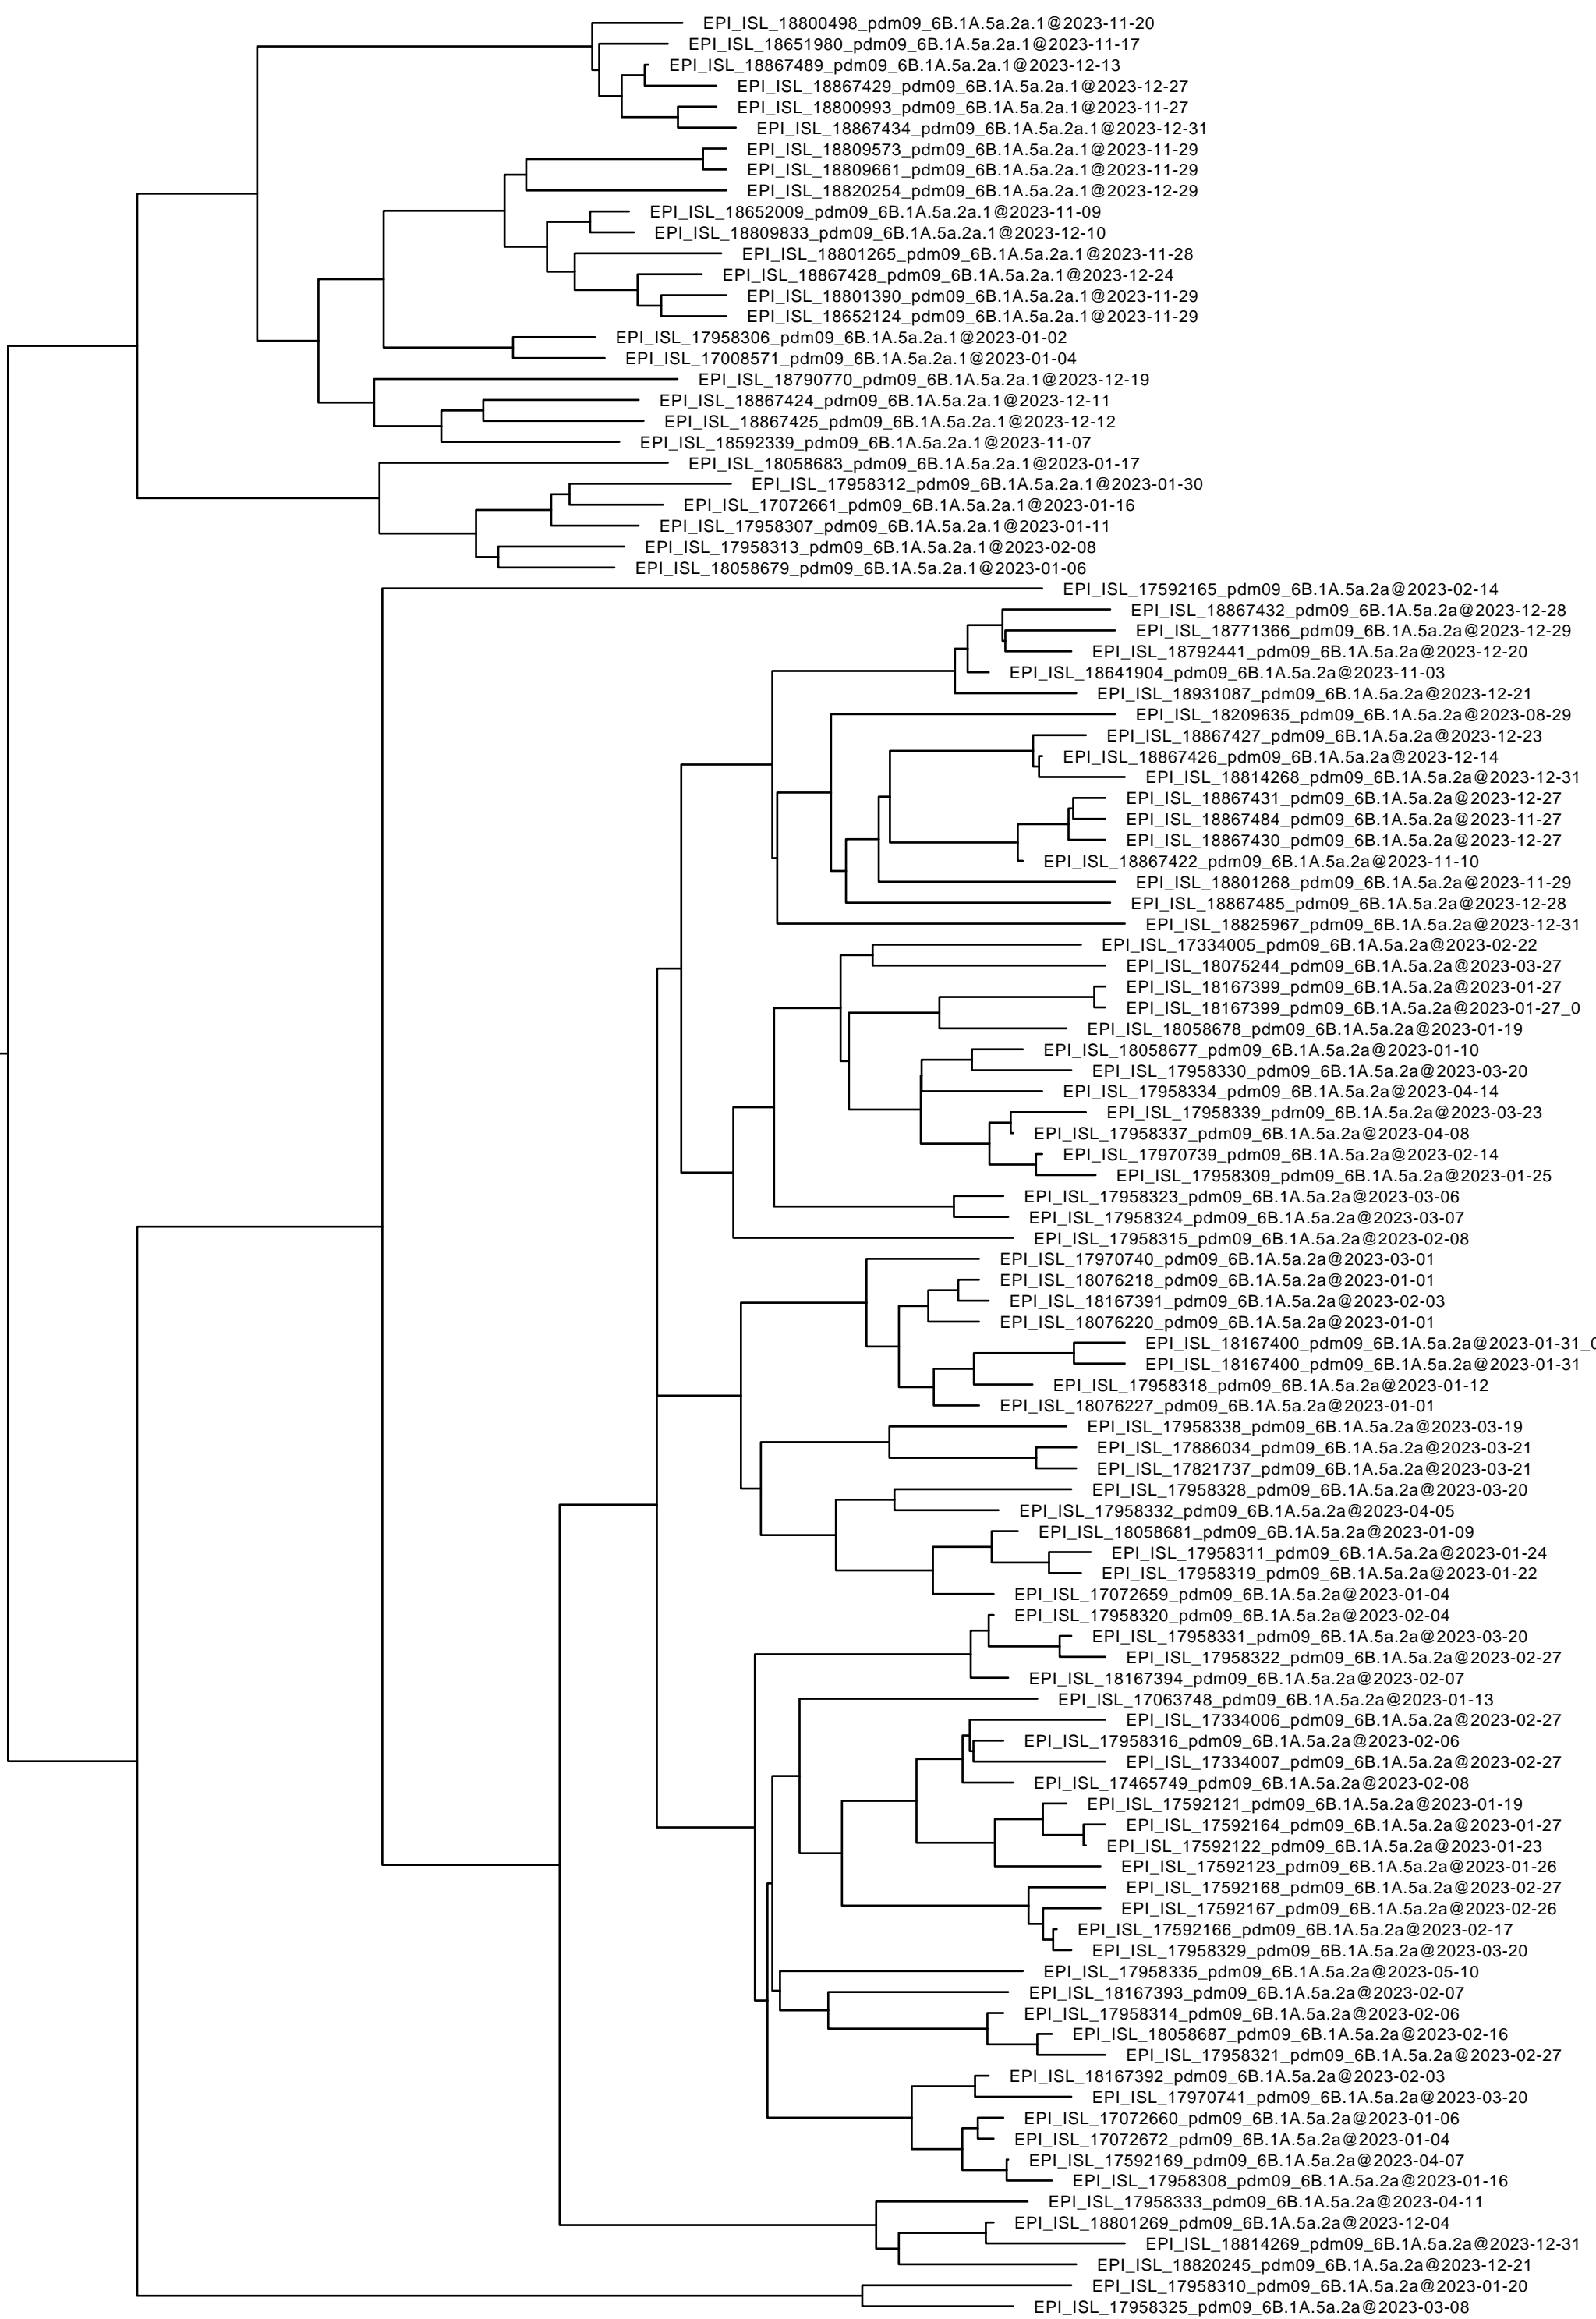

0.08

Supplement: s1 [file s1]
